# Supplementary material for: Expression and sub-cellular localization of an epigenetic regulator, co-activator arginine methyltransferase 1 (CARM1), is associated with specific breast cancer subtypes and ethnicity
Source: PubMed Central journal article supplement (PMC3663705; doi:10.1186/1476-4598-12-40), 2013-05-10
Supplement: 1476-4598-12-40-S2.pdf [file 1476-4598-12-40-S2.pdf]

Supp Fig 1. Cyto-CARM1 survival associations by ER status

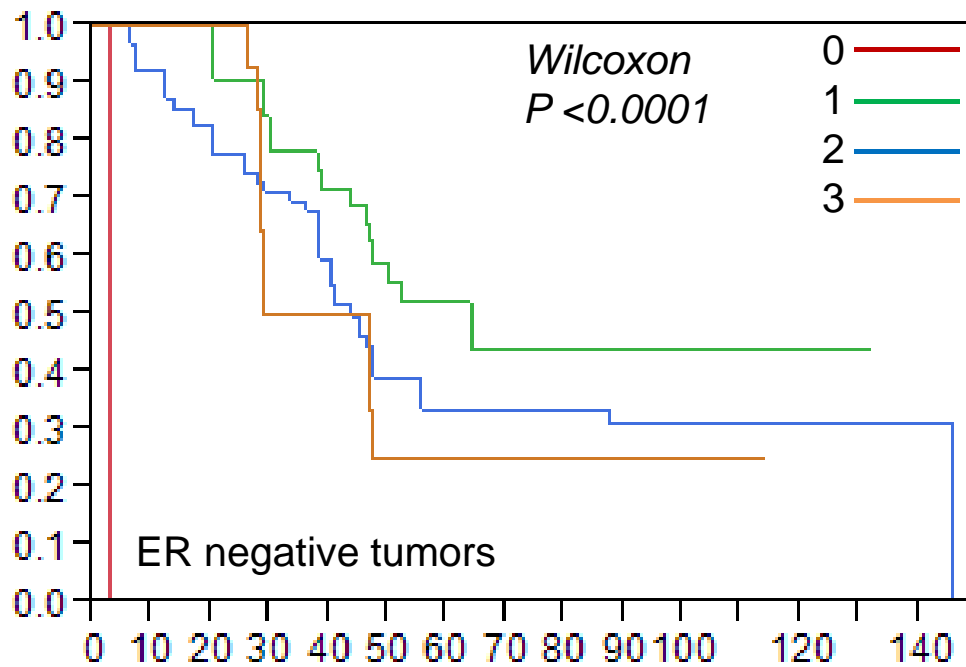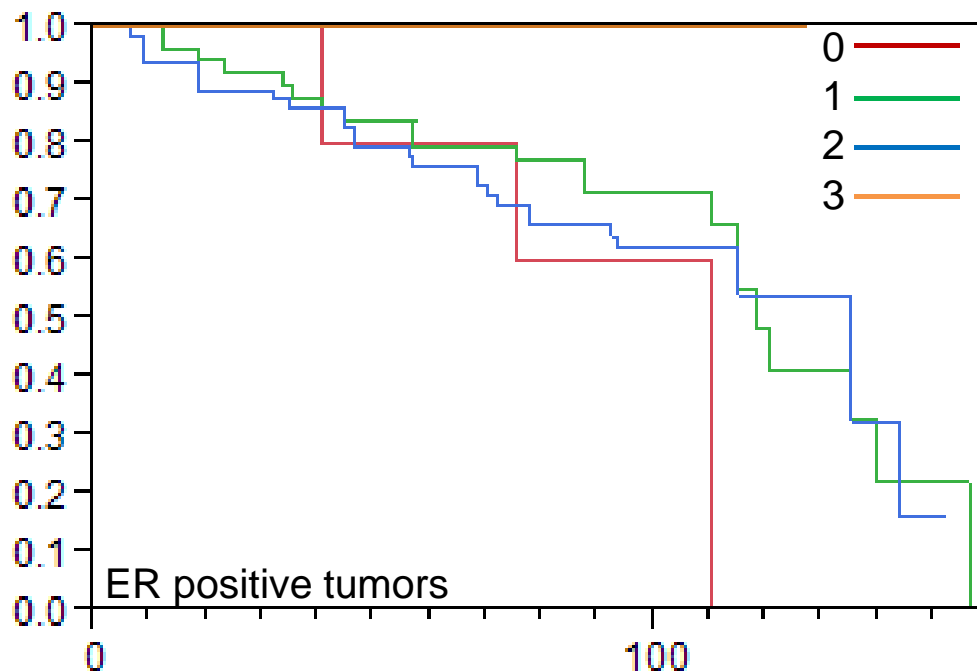

| Group    | Number failed | Number censored | Mean    |        | Std Error |
|----------|---------------|-----------------|---------|--------|-----------|
| 0        | 1             | 0               | 2.98973 |        | .         |
| 1        | 17            | 18              | 50.6772 | Biased | 2.87251   |
| 2        | 43            | 23              | 68.5101 |        | 7.143     |
| 3        | 10            | 4               | 37.579  | Biased | 2.71505   |
| Combined | 71            | 45              | 72.4725 |        | 5.38971   |

#### Quantiles

| Group    | Median Time | Lower 95% | Upper 95% | 25% Failures | 75% Failures |
|----------|-------------|-----------|-----------|--------------|--------------|
| 0        | 2.9897      | .         | .         | 2.9897       | 2.9897       |
| 1        | 63.869      | 43.63     | .         | 38.259       | .            |
| 2        | 43.63       | 37.947    | 55.622    | 25.561       | 145.84       |
| 3        | 37.848      | 27.992    | 47.474    | 27.992       | .            |
| Combined | 46.62       | 39.951    | 55.622    | 28.945       | 145.84       |

#### Tests Between Groups

| Test     | ChiSquare | DF | Prob>ChiSq |
|----------|-----------|----|------------|
| Log-Rank | 114.2507  | 3  | <.0001*    |
| Wilcoxon | 115.0641  | 3  | <.0001*    |

| Group    | Number failed | Number censored | Mean    |        | Std Error |
|----------|---------------|-----------------|---------|--------|-----------|
| 0        | 3             | 2               | 89.2518 |        | 15.3084   |
| 1        | 22            | 30              | 109.764 |        | 7.26686   |
| 2        | 29            | 40              | 103.376 | Biased | 6.18918   |
| 3        | 0             | 5               | .       |        | .         |
| Combined | 54            | 77              | 109.233 |        | 4.70401   |

#### Quantiles

| Group    | Median Time | Lower 95% | Upper 95% | 25% Failures | 75% Failures |
|----------|-------------|-----------|-----------|--------------|--------------|
| 0        | 110.23      | 40.378    | 110.23    | 75.203       | 110.23       |
| 1        | 117.98      | 110.23    | 139.47    | 87.819       | 139.47       |
| 2        | 135.13      | 93.306    | 143.84    | 68.37        | 143.84       |
| 3        | .           | .         | .         | .            | .            |
| Combined | 135.13      | 115.02    | 139.47    | 75.203       | 143.84       |

#### Tests Between Groups

| Test     | ChiSquare | DF | Prob>ChiSq |
|----------|-----------|----|------------|
| Log-Rank | 3.5345    | 3  | 0.3163     |
| Wilcoxon | 2.7991    | 3  | 0.4237     |
