# Supplementary material for: Expression and sub-cellular localization of an epigenetic regulator, co-activator arginine methyltransferase 1 (CARM1), is associated with specific breast cancer subtypes and ethnicity
Source: PubMed Central journal article supplement (PMC3663705; doi:10.1186/1476-4598-12-40), 2013-05-10

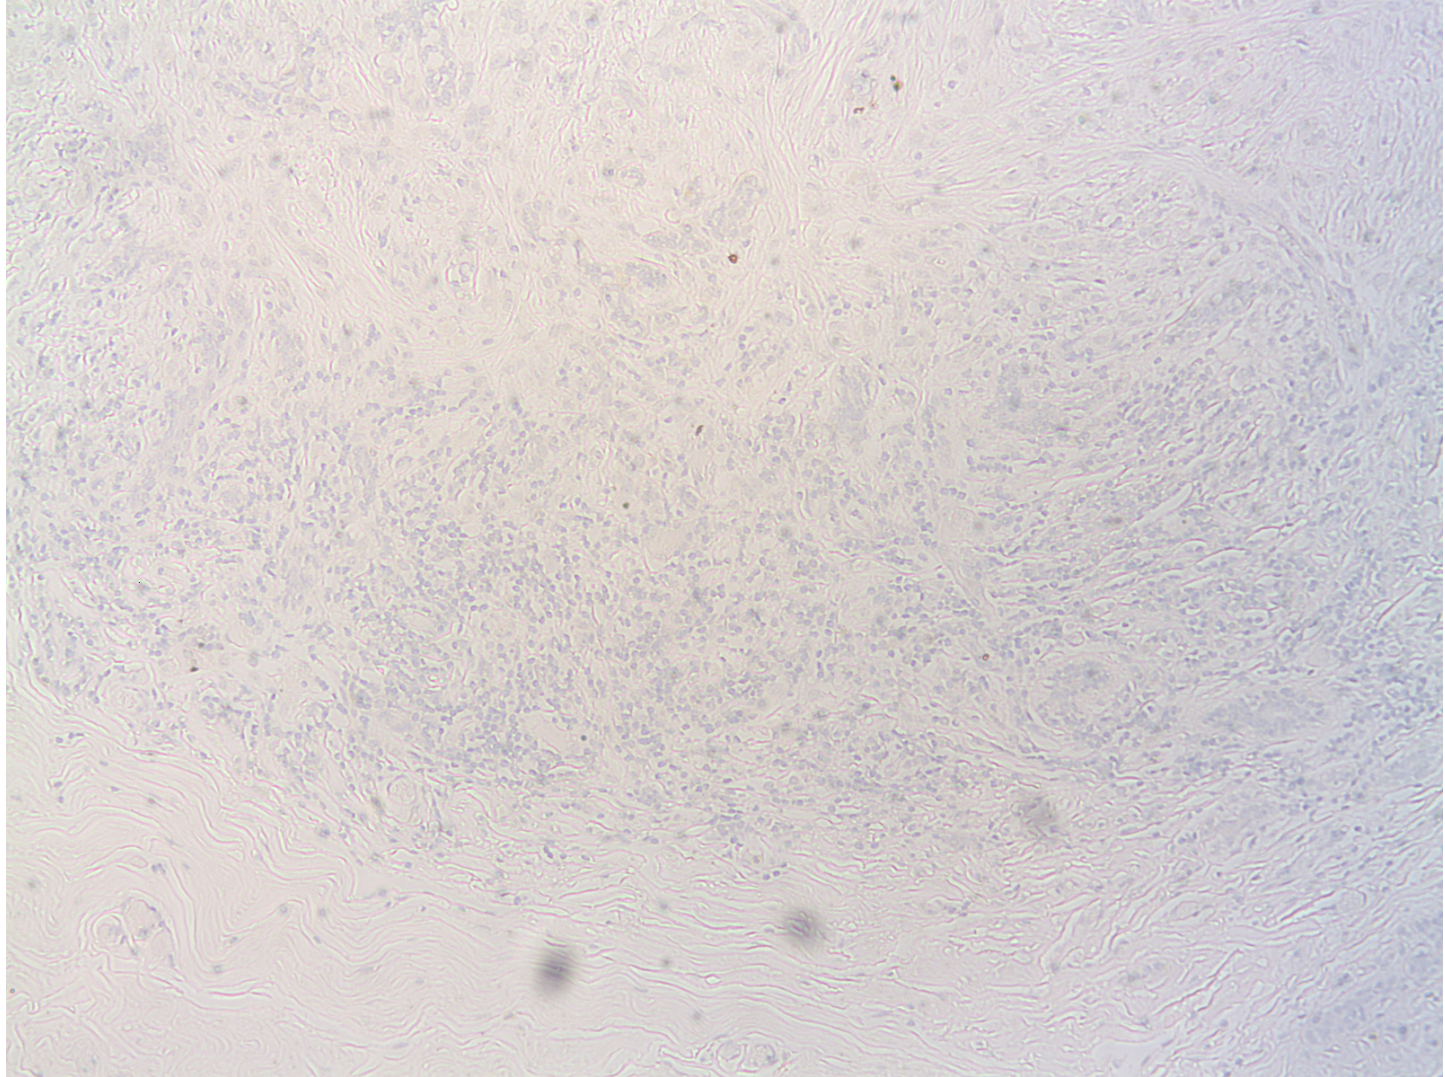

Supplement: 1476-4598-12-40-S4.pdf [file 1476-4598-12-40-S4.pdf]
